# Supplementary material for: Catalytic hydrosilylation using an immobilized Co-terpyridine complex activated by inorganic salts and its application in a flow reactor
Source: Royal Society of Chemistry journal article supplement (doi:10.1039/d3nj01062g), 2023-01-01
Supplement: d3nj01062g1.pdf [file d3nj01062g1.pdf]

## **Supplementary Information**

### **Catalytic hydrosilylation by immobilized Co-terpyridine complex activated by inorganic salts and its application to flow reactor**

Katsuaki Kobayashi, Norihisa Fukaya, Hiroshi Nakawaza

## General information

$^1\text{H}$  NMR and  $^{13}\text{C}\{^1\text{H}\}$  NMR spectra were recorded using a JEOL JNM-AL 400 spectrometer. The residual peaks of the solvent or TMS were used as internal standards. GC analyses were carried out using a Shimadzu GC-2014 equipped with a DB-1 (Agilent, 30 m, 0.25 mm ID, 0.25  $\mu\text{m}$ ) capillary column. The product yields were determined based on the calibration curve of each authentic sample. Continuous flow experiment was performed using EYLA FLOWREACTOR MCR-1000 which was connected to a fraction collector, EYELA DC-1500. The mixture of substrates was supplied to the reactor through the pump unit, EYELA EUI-22.

The energy-dispersive X-ray fluorescence spectrometer (EDXRF) measurement was carried out using a Shimadzu EDX-800HS spectrometer. Elemental analysis measurement of carbon and nitrogen content was conducted using a PerkinElmer 2400II instrument. Inductively coupled plasma mass spectrometry (ICP-MS) analysis was performed using an Agilent ICP 8800.

## Materials

All other reagents were purchased from commercial sources and used as received. Hydrosilylated products **3**,<sup>1</sup> **4**,<sup>2</sup> **5**,<sup>3</sup> **6**,<sup>4</sup> **7**,<sup>1</sup> **8**,<sup>5</sup> **9**<sup>5</sup> and **10**<sup>5</sup> were synthesized as authentic samples according to the literatures.

### **Characterization of Co(tpy)Br<sub>2</sub>@SiO<sub>2</sub>**

The content of Co and Br in the **Co(tpy)Br<sub>2</sub>@SiO<sub>2</sub>** catalyst was analyzed by EDXRF measurement with accelerating voltage of 15 kV, while the content of C and N in the tpy ligand unit in catalyst was determined by elemental analysis to disclose the overall elemental composition of **Co(tpy)Br<sub>2</sub>@SiO<sub>2</sub>**.

### **Study on detachment of the Co complex from the silica gel**

2.5 mL of nitric acid was added to the products of hydrosilylation reaction of 1-octene and Ph<sub>2</sub>SiH<sub>2</sub> using **Co(tpy)Br<sub>2</sub>@SiO<sub>2</sub>** catalyst, then all organic compounds were decomposed by microwave irradiation. 0.25 mL of hydrofluoric acid was added to the resulting sample to dissolve the metallic components, and then the mixture was diluted with water to 25 mL. The amount of Co in the resulting aqueous solution was determined by ICP-MS analysis. The content of Co in the resulting aqueous solution was lower than the detection limit of ICP-MS (0.5 µg/g).

### **Hydrosilylation by various amount of Co(tpy)Br<sub>2</sub>@SiO<sub>2</sub> activated by K<sub>2</sub>CO<sub>3</sub>.**

Hydrosilylation catalyzed by various amount of **Co(tpy)Br<sub>2</sub>@SiO<sub>2</sub>** was conducted in the presence of 2.5 mol% K<sub>2</sub>CO<sub>3</sub>.



Table S1 Hydrosilylation by various amount of **Co(tpy)Br<sub>2</sub>@SiO<sub>2</sub>** activated by K<sub>2</sub>CO<sub>3</sub>.

| Entry | amount of <b>Co(tpy)Br<sub>2</sub>@SiO<sub>2</sub></b> | olefin   | hydrosilane                      | Yield (%) <sup>a</sup>            |
|-------|--------------------------------------------------------|----------|----------------------------------|-----------------------------------|
| 1     | 10 mg                                                  | styrene  | (EtO) <sub>3</sub> SiH           | <b>1</b> : 90                     |
| 2     | 20 mg                                                  | styrene  | (EtO) <sub>3</sub> SiH           | <b>1</b> : 89                     |
| 3     | 30 mg                                                  | styrene  | (EtO) <sub>3</sub> SiH           | <b>1</b> : 89                     |
| 4     | 40 mg                                                  | styrene  | (EtO) <sub>3</sub> SiH           | <b>1</b> : 91                     |
| 5     | 50 mg                                                  | styrene  | (EtO) <sub>3</sub> SiH           | <b>1</b> : 92                     |
| 6     | 10 mg                                                  | 1-octene | Ph <sub>2</sub> SiH <sub>2</sub> | <b>2l</b> : 39 ( <b>2b</b> : 1.6) |
| 7     | 20 mg                                                  | 1-octene | Ph <sub>2</sub> SiH <sub>2</sub> | <b>2l</b> : 57 ( <b>2b</b> : 2.8) |
| 8     | 30 mg                                                  | 1-octene | Ph <sub>2</sub> SiH <sub>2</sub> | <b>2l</b> : 67 ( <b>2b</b> : 2.1) |
| 9     | 40 mg                                                  | 1-octene | Ph <sub>2</sub> SiH <sub>2</sub> | <b>2l</b> : 72 ( <b>2b</b> : 3.3) |
| 10    | 50 mg                                                  | 1-octene | Ph <sub>2</sub> SiH <sub>2</sub> | <b>2l</b> : 88 ( <b>2b</b> : 2.1) |

<sup>a</sup>Determined by GC.

### Hydrosilylation by $\text{Co}(\text{tpy})\text{Br}_2@\text{SiO}_2/\text{K}_2\text{CO}_3$ in various solvents.

Hydrosilylation of 1-octene with  $\text{Ph}_2\text{SiH}_2$  catalyzed by  $\text{Co}(\text{tpy})\text{Br}_2@\text{SiO}_2/\text{K}_2\text{CO}_3$  in the presence of various solvents was conducted. Toluene, THF, acetonitrile, and MeOH were selected as a solvent (Eq. 3).

$\text{Co}(\text{tpy})\text{Br}_2@\text{SiO}_2$  (50 mg) and  $\text{K}_2\text{CO}_3$  (19 mg, 2.5 mol%) were placed in a Schlenk tube. The air in the tube was replaced with  $\text{N}_2$ . 1-Octene (0.85 mL, 5.4 mmol),  $\text{Ph}_2\text{SiH}_2$  (1.0 mL, 5.4 mmol), and a solvent (1.0 mL) were added to the tube. The suspension was heated at 100 °C and stirred for 24 h. Then, the solution was cooled to room temperature.  $\text{Co}(\text{tpy})\text{Br}_2@\text{SiO}_2$  and  $\text{K}_2\text{CO}_3$  were separated by centrifugation and the supernatant was analyzed by GC. Results are summarized in Table S4. Toluene and THF were suitable solvents (Table S2, entries 1 and 2). Especially with THF, the total yield of products (**2I** + **2b**) was 99%. In contrast, when acetonitrile and MeOH were used, the hydrosilylated products were not obtained at all (entries 3 and 4).

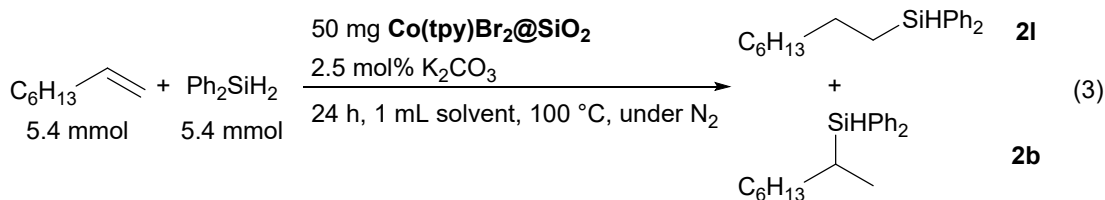

Table S2 Hydrosilylation of 1-octene with Ph<sub>2</sub>SiH<sub>2</sub> by Co(tpy)Br<sub>2</sub>@SiO<sub>2</sub>/K<sub>2</sub>CO<sub>3</sub> in the presence of various solvents.

| entry | solvent      | yield <sup>a</sup>                  |
|-------|--------------|-------------------------------------|
| 1     | toluene      | <b>2l</b> : 81% ( <b>2b</b> : 2.6%) |
| 2     | THF          | <b>2l</b> : 97% ( <b>2b</b> : 2.6%) |
| 3     | acetonitrile | N.D. <sup>b</sup>                   |
| 4     | MeOH         | N.D. <sup>b</sup>                   |

<sup>a</sup>Determined by GC. <sup>b</sup>Not detected.

#### Hydrosilylation by Co(tpy)Br<sub>2</sub>@SiO<sub>2</sub>/K<sub>2</sub>CO<sub>3</sub> through the continuous flow reactor.

500 mg Co(tpy)Br<sub>2</sub>@SiO<sub>2</sub> and 200 mg K<sub>2</sub>CO<sub>3</sub> were mixed and packed into a stainless-steel tubular reactor (5 mm internal diameter, 100 mm length) in air. The tube reactor was attached with two filters at the both ends, and was set into the temperature controller. Reaction temperature was dependent on the solvent (toluene: 100 °C, THF: 60 °C). Substrate solution was degassed by N<sub>2</sub> bubbling for 30 min. Flow rate of the substrate mixture was 0.03 mL/min, which continued for 24 h. The product was fractionated at hourly intervals using a fraction collector. Each fraction was analyzed by GC.

## References

1. M. D. Greenhalgh, D. J. Frank and S. P. Thomas, *Adv. Synth. Catal.*, 2014, **356**, 584-590.
2. B. Raya, S. Jing, V. Balasanthiran and T. V. RajanBabu, *ACS Catal.*, 2017, **7**, 2275-2283.
3. D. Taguchi, K. Kobayashi, T. Moriuchi and H. Nakazawa, *Bull. Chem. Soc. Jpn.*, 2020, **93**, 1086-1094.
4. S. Gutiérrez-Tarriño, P. Concepción and P. Oña-Burgos, *Eur. J. Inorg. Chem.*, 2018, 4867-4874.
5. K. Kobayashi and H. Nakazawa, *Dalton Trans.*, 2022, **51**, 18685-18692.
